# Supplementary material for: Hydrogen atom vs electron transfer in catecholase-mimetic oxidations by superoxometal complexes. Deuterium kinetic isotope effects
Source: Royal Society of Chemistry journal article supplement (doi:10.1039/b412500b), 2004-12-06
Supplement: b412500b.doc [file b412500b.doc]

**Hydrogen Atom vs Electron Transfer in Catecholase-Mimetic Oxidations by Superoxometal Complexes. Deuterium Kinetic**

**Isotope Effects**

**Tatiana M. Simándi, Zoltán May, Imola Cs. Szigyártó and László I. Simándi***

**Supplementary material**

**Calculation of deuterium isotope effects for equilibrium constants *K*2 and *K*3**

According to statistical mechanics, the isotope effect on chemical equilibria can be described in terms of partition functions. It depends primarily on the difference in vibrational zero point energies between reactants and products, and can be calculated to a good approximation from the frequencies of normal vibrations. 6b In the present case the calculations have been made as follows.

An approximate expression for an equilibrium constant *K* can be obtained by considering the vibrational partition functions, and retaining the contributions from the zero-point energies only. 6b That treatment leads to the equation

*K* = exp[ (2.414x10-3) { (i)right -  (j)left}]

where i and j are the wavenumbers of the *i*th and *j*th normal vibrations of the products (right-hand side) and the reactants (left-hand side) of the equilibrium, respectively. Only the normal vibrations involving the reaction centre in X, *i.e*. the O-H stretching and deformation vibrations are taken into consideration. The other vibrations can be regarded as independent of the isotopic medium, therefore, they cancel out. The numerical factor is based on the expression of the zero-point energies with the wavenumbers:

*u*i  = *Nhc*i / *RT* = 2.414x10-3i (for T = 298 K)

where *u*i  is the *i*th zero-point energy.

The ratios of the equilibrium constants in MeOH and MeOD were calculated using the expressions

exp[(2.414x10-3) { (i)right -  (j)left}H]

*K*H/*K*D = 

exp[(2.414x10-3) { (i)right -  (j)left}D]

The wavenumbers used in the calculations were taken from standard sources 9 whenever available. The following ratios of OH to OD wavenumbers were used to calculate OD from OH values:

(OD) = (OH)/1.41

(OD) = (OH)/1.15

(OD) = (OH)/1.15

The OH ..O bands of HX were regarded as identical to those of the H-bonded Hacac- ring 8, or approximated by the average of the components, e.g. [(HOap)+ (FeOOH)]/2, etc*.* Remarkably, both sets of values gave closely identical results.

The wavenumbers used in the calculations of the equilibrium constant ratios *K*2H/*K*2D and *K*3H/*K*3D are listed in Table S1.

**Table S1** Infrared frequencies used in the calculation of *K*2H/*K*2D and *K*3H/*K*3D. Values involving OD groups are calculated, except for MeOD, which is experimental.

| Vibrat | MeOH | MeOD | HOAp | DOAp | FeOOHa | FeOODb | XHc | XD | HOCat | DOCat |
| --- | --- | --- | --- | --- | --- | --- | --- | --- | --- | --- |
| (OL)d |  |  |  |  |  |  |  |  | 3640e | 2580 |
| (OL) | 3344 | 2492 | 2816 | 2000 | 3390 | 2400 | 2900 | 2056 | 3250e | 2305 |
| (OL) | 1421 | 1231 | 1400 | 1212 | 1400 | 1212 | 1450 | 1260 | 1250 | 1087 |
| (OL) | 667 | 474 | 841 | 730 | 621 | 538 | 388 | 337 | 630 | 548 |

a same as for tBuOOH

b same as for tBuOOD

c taken from Ref. 8

d L = H or D

e two (OL) frequencies exist

The results of calculations are presented in Table S2.

**Table S2** Calculated isotope effects on the ratios of equilibrium constants *K*2 and *K*3

| Catalyst | Substrate | Solvent | K2H /K2D | K3H /K3D |
| --- | --- | --- | --- | --- |
| [Fe(Hdmg)2(MeIm)] | dtbc | MeOH/MeOD | 1.001 | 1.003 |
| [Co(Hdmg)2(Ph3P)] | dtbc | MeOH/MeOD | 1.001 | 1.003 |
| [Fe(Hdmg)2(MeIm)] | Hap | MeOH/MeOD | 1.005 | 1.004 |
| [Co(Hdmg)2(Ph3P)] | Hap | MeOH/MeOD | 1.005 | 1.004 |

Remarkably, the ratios in Table S2 are indistinguishable from unity.
